# Supplementary material for: Altered CSF Proteomic Profiling of Paediatric Acute Lymphocytic Leukemia Patients with CNS Infiltration
Source: Hindawi journal article supplement (doi:10.1155/2019/3283629), 2019-05-02
Supplement: f1 [file 3283629.f1.pdf]

Supplementary Table S1 An average of 428 unique proteins of all PRE-CSF and POST-CSF samples were identified by measuring peptides signal intensity for protein abundance.

Supplementary Figure S1 Gene Ontology (GO) analysis of all identified proteins that expressed in POST-CSF samples.

Supplementary Figure S2 Validation of SPARC and HRG protein peaks by western blot. (A) Immunoblot of SPARC and HRG proteins in PRE-CSF and POST-CSF samples. Fifty micrograms of PRE-CSF (lanes 1–3) or POST-CSF (lanes 4–6) CSF were subjected to the lanes. (B) and (C) The relative quantification of SPARC and HRG proteins from panels(A) using Image J software, respectively.

Supplementary Figure S1

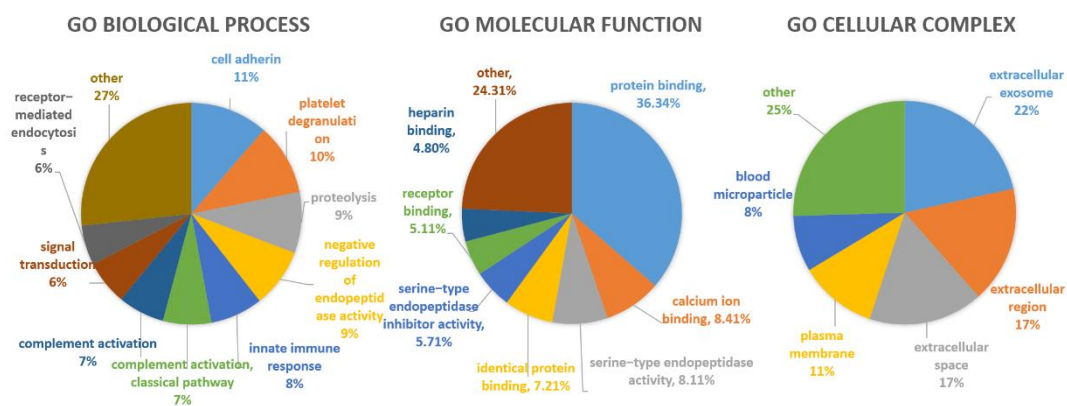

Supplementary Figure S2

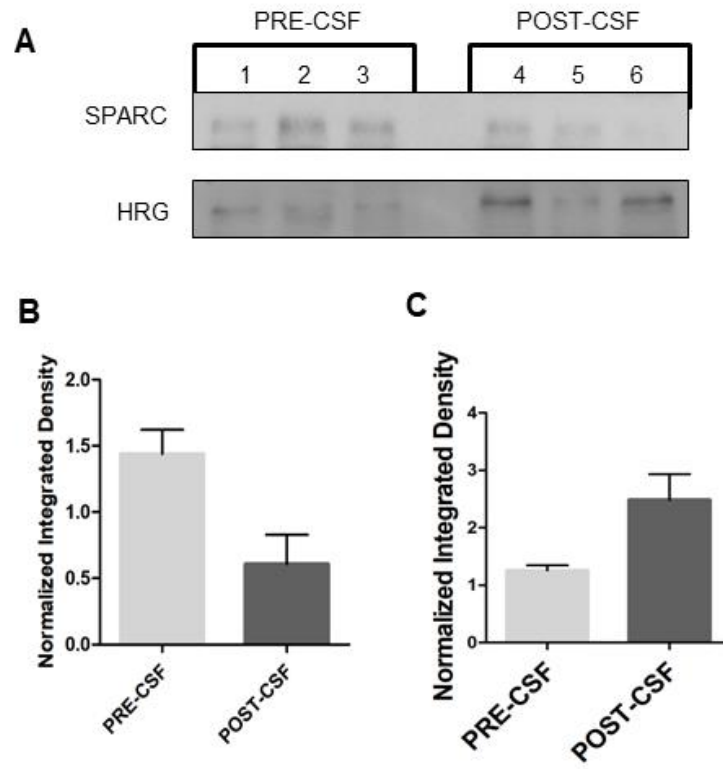

Supplementary Table S1

| Protein IDs |                                                                 | Mol. weight [kDa] |
|-------------|-----------------------------------------------------------------|-------------------|
| P01031      | complement C5(C5)                                               | 188.3             |
| P55286      | cadherin 8(CDH8)                                                | 88.253            |
| P01613      | immunoglobulin kappa variable 1D-33(IGKV1D-33)                  | 12.848            |
| O43493      | trans-golgi network protein 2(TGOLN2)                           | 51.019            |
| Q9UBQ6      | exostosin like glycosyltransferase 2(EXTL2)                     | 37.466            |
| Q92911      | solute carrier family 5 member 5(SLC5A5)                        | 68.666            |
| P01702      | immunoglobulin lambda variable 1-51(IGLV1-51)                   | 12.249            |
| Q16653      | myelin oligodendrocyte glycoprotein(MOG)                        | 28.193            |
| Q99946      | proline rich transmembrane protein 1(PRRT1)                     | 31.43             |
| Q7Z5M8      | abhydrolase domain containing 12B(ABHD12B)                      | 40.776            |
| Q9UBX1      | cathepsin F(CTSF)                                               | 53.366            |
| P60033      | CD81 molecule(CD81)                                             | 25.809            |
| O75787      | ATPase H <sup>+</sup> transporting accessory protein 2(ATP6AP2) | 39.008            |
| Q9P232      | contactin 3(CNTN3)                                              | 112.883           |
| Q6EMK4      | vasorin(VASN)                                                   | 71.712            |
| P01714      | immunoglobulin lambda variable 3-19(IGLV3-19)                   | 12.042            |
| Q9NYX4      | calcyon neuron specific vesicular protein(CALY)                 | 23.434            |
| P07357      | complement C8 alpha chain(C8A)                                  | 65.163            |
| P49641      | mannosidase alpha class 2A member 2(MAN2A2)                     | 130.539           |
| P11047      | laminin subunit gamma 1(LAMC1)                                  | 177.603           |
| Q13555      | calcium/calmodulin dependent protein kinase II gamma(CAMK2G)    | 62.607            |
| Q12907      | lectin, mannose binding 2(LMAN2)                                | 40.229            |
| P62328      | thymosin beta 4, X-linked(TMSB4X)                               | 5.053             |
| Q6UX73      | chromosome 16 open reading frame 89(C16orf89)                   | 45.391            |

|        |                                                                       |         |
|--------|-----------------------------------------------------------------------|---------|
| Q6UXD5 | seizure related 6 homolog like 2(SEZ6L2)                              | 97.56   |
| P02654 | apolipoprotein C1(APOC1)                                              | 9.3318  |
| P04179 | superoxide dismutase 2, mitochondrial(SOD2)                           | 24.722  |
| O94760 | dimethylarginine dimethylaminohydrolase 1(DDAH1)                      | 31.122  |
| Q13519 | prepronociceptin(PNOC)                                                | 20.295  |
| P34096 | ribonuclease A family member 4(RNASE4)                                | 16.84   |
| O95967 | EGF containing fibulin like extracellular matrix protein<br>2(EFEMP2) | 49.405  |
| P01703 | immunoglobulin lambda variable 1-40(IGLV1-40)                         | 10.904  |
| Q03591 | complement factor H related 1(CFHR1)                                  | 37.651  |
| P13473 | lysosomal associated membrane protein 2(LAMP2)                        | 44.961  |
| P01621 | immunoglobulin kappa variable 3-20(IGKV3-20)                          | 10.729  |
| P40925 | malate dehydrogenase 1(MDH1)                                          | 36.426  |
| P07585 | decorin(DCN)                                                          | 39.747  |
| P23468 | protein tyrosine phosphatase, receptor type D(PTPRD)                  | 214.76  |
| P01772 | immunoglobulin heavy variable 3-33(IGHV3-33)                          | 13.074  |
| Q9NQX5 | neural proliferation, differentiation and control<br>1(NPDC1)         | 34.516  |
| P35908 | keratin 2(KRT2)                                                       | 65.865  |
| Q5BIV9 | shadow of prion protein homolog (zebrafish)(SPRN)                     | 14.522  |
| Q8N2C7 | unc-80 homolog, NALCN activator(UNC80)                                | 363.39  |
| Q99969 | retinoic acid receptor responder 2(RARRES2)                           | 18.618  |
| O60883 | G protein-coupled receptor 37 like 1(GPR37L1)                         | 52.77   |
| Q9H0J4 | glutamine rich 2(QRICH2)                                              | 180.827 |
| P01127 | platelet derived growth factor subunit B(PDGFB)                       | 27.283  |
| O95155 | ubiquitination factor E4B(UBE4B)                                      | 146.185 |
| P01605 | immunoglobulin kappa variable 1D-33(IGKV1D-33)                        | 12.848  |
| P04156 | prion protein(PRNP)                                                   | 27.661  |

|        |                                                                 |         |
|--------|-----------------------------------------------------------------|---------|
| P09382 | galectin 1(LGALS1)                                              | 14.716  |
| Q9BYH1 | seizure related 6 homolog like(SEZ6L)                           | 111.782 |
| P43251 | biotinidase(BTD)                                                | 61.132  |
| Q16620 | neurotrophic receptor tyrosine kinase 2(NTRK2)                  | 91.998  |
| O95196 | chondroitin sulfate proteoglycan 5(CSPG5)                       | 60.016  |
| Q86Y38 | xylosyltransferase 1(XYLT1)                                     | 107.569 |
| Q9BY67 | cell adhesion molecule 1(CADM1)                                 | 48.509  |
| Q5VYK3 | KIAA0368(KIAA0368)                                              | 204.29  |
| Q8IUB2 | WAP four-disulfide core domain 3(WFDC3)                         | 24.687  |
| O94772 | lymphocyte antigen 6 complex, locus H(LY6H)                     | 14.669  |
| Q9UPY3 | dicer 1, ribonuclease III(DICER1)                               | 218.682 |
| A6NML5 | transmembrane protein 212(TM212)                                | 21.425  |
| P18428 | lipopolysaccharide binding protein(LBP)                         | 53.384  |
| Q6P387 | chromosome 16 open reading frame 46(C16orf46)                   | 43.417  |
| Q15256 | protein tyrosine phosphatase, receptor type R(PTPRR)            | 73.834  |
| Q8N2S1 | latent transforming growth factor beta binding protein 4(LTBP4) | 173.435 |
| Q9HAT2 | sialic acid acetyltransferase(SIAE)                             | 58.315  |
| P21926 | CD9 molecule(CD9)                                               | 25.416  |
| P01213 | prodynorphin(PDYN)                                              | 28.385  |
| P48061 | C-X-C motif chemokine ligand 12(CXCL12)                         | 10.666  |
| P07711 | cathepsin L(CTSL)                                               | 37.564  |
| P21810 | biglycan(BGN)                                                   | 41.654  |
| Q9BU40 | chordin like 1(CHRD1)                                           | 51.168  |
| P02745 | complement C1q A chain(C1QA)                                    | 26.017  |
| A6NLU5 | V-set and transmembrane domain containing 2B(VSTM2B)            | 30.297  |
| Q15582 | transforming growth factor beta induced(TGFBI)                  | 74.681  |

|            |                                                                 |         |
|------------|-----------------------------------------------------------------|---------|
| Q9NXZ2     | DEAD-box helicase 43(DDX43)                                     | 72.844  |
| Q86XK3     | SWI5 dependent homologous recombination repair protein 1(SFR1)  | 28.262  |
| Q06828     | fibromodulin(FMOD)                                              | 43.179  |
| P04066     | fucosidase, alpha-L- 1, tissue(FUCA1)                           | 53.619  |
| P04003     | complement component 4 binding protein alpha(C4BPA)             | 67.033  |
| Q6ZWL3     | cytochrome P450 family 4 subfamily V member 2(CYP4V2)           | 60.723  |
| O14498     | immunoglobulin superfamily containing leucine rich repeat(ISLR) | 45.997  |
| Q5FWE<br>3 | proline rich transmembrane protein 3(PRRT3)                     | 102.197 |
| P23582     | natriuretic peptide C(NPPC)                                     | 13.246  |
| Q9Y5Y7     | lymphatic vessel endothelial hyaluronan receptor 1(LYVE1)       | 35.213  |
| Q16769     | glutaminyl-peptide cyclotransferase(QPCT)                       | 40.877  |
| Q9UNN8     | protein C receptor(PROCR)                                       | 26.671  |
| Q9HCB6     | spondin 1(SPON1)                                                | 90.973  |
| P14543     | nidogen 1(NID1)                                                 | 136.377 |
| P16070     | CD44 molecule (Indian blood group)(CD44)                        | 81.538  |
| Q14508     | WAP four-disulfide core domain 2(WFDC2)                         | 12.993  |
| Q96PD5     | peptidoglycan recognition protein 2(PGLYRP2)                    | 62.216  |
| P29966     | myristoylated alanine rich protein kinase C substrate(MARCKS)   | 31.555  |
| Q92820     | gamma-glutamyl hydrolase(GGH)                                   | 35.964  |
| Q9NZT1     | calmodulin like 5(CALML5)                                       | 15.892  |
| Q9UBX7     | kallikrein related peptidase 11(KLK11)                          | 31.059  |

|            |                                                                  |         |
|------------|------------------------------------------------------------------|---------|
| P27169     | paraoxonase 1(PON1)                                              | 39.731  |
| P01602     | immunoglobulin kappa variable 1-5(IGKV1-5)                       | 12.768  |
| P05109     | S100 calcium binding protein A8(S100A8)                          | 10.834  |
| Q9H3G5     | carboxypeptidase, vitellogenic like(CPVL)                        | 54.164  |
| Q9Y287     | integral membrane protein 2B(ITM2B)                              | 30.338  |
| P19827     | inter-alpha-trypsin inhibitor heavy chain 1(ITIH1)               | 101.389 |
| P01040     | cystatin A(CSTA)                                                 | 11.006  |
| P80748     | immunoglobulin lambda variable 3-21(IGLV3-21)                    | 12.446  |
| Q96RL7     | vacuolar protein sorting 13 homolog A(VPS13A)                    | 360.276 |
| P01765     | immunoglobulin heavy variable 3-23(IGHV3-23)                     | 11.612  |
| P55083     | microfibrillar associated protein 4(MFAP4)                       | 28.648  |
| Q9UHL4     | dipeptidyl peptidase 7(DPP7)                                     | 54.341  |
| P29622     | serpin family A member 4(SERPINA4)                               | 48.542  |
| Q14C87     | transmembrane protein 132D(TMEM132D)                             | 122.309 |
| Q6MZW<br>2 | folistatin like 4(FSTL4)                                         | 93.096  |
| O75144     | inducible T-cell costimulator ligand(ICOSLG)                     | 33.349  |
| Q86UX2     | inter-alpha-trypsin inhibitor heavy chain family member 5(ITIH5) | 104.576 |
| P08174     | CD55 molecule (Cromer blood group)(CD55)                         | 41.4    |
| P47972     | neuronal pentraxin 2(NPTX2)                                      | 47.042  |
| P02792     | ferritin light chain(FTL)                                        | 20.02   |
| Q9NT99     | leucine rich repeat containing 4B(LRRC4B)                        | 76.434  |
| Q9UQM<br>7 | calcium/calmodulin dependent protein kinase II alpha(CAMK2A)     | 54.088  |
| Q92520     | family with sequence similarity 3 member C(FAM3C)                | 24.68   |
| P01603     | immunoglobulin kappa variable 1D-33(IGKV1D-33)                   | 12.848  |
| P62826     | RAN, member RAS oncogene family(RAN)                             | 24.423  |

|            |                                                     |         |
|------------|-----------------------------------------------------|---------|
| P00491     | purine nucleoside phosphorylase(PNP)                | 32.118  |
| P06702     | S100 calcium binding protein A9(S100A9)             | 13.242  |
| P00918     | carbonic anhydrase 2(CA2)                           | 29.246  |
| P04040     | catalase(CAT)                                       | 59.756  |
| P32119     | peroxiredoxin 2(PRDX2)                              | 21.892  |
| P02042     | hemoglobin subunit delta(HBD)                       | 16.055  |
| P69892     | hemoglobin subunit gamma 2(HBG2)                    | 16.126  |
| P13598     | intercellular adhesion molecule 2(ICAM2)            | 30.654  |
| P35555     | fibrillin 1(FBN1)                                   | 312.237 |
| Q86UD1     | out at first homolog(OAF)                           | 30.688  |
| P55283     | cadherin 4(CDH4)                                    | 100.281 |
| Q9HDB5     | neurexin 3(NRXN3)                                   | 69.305  |
| P23528     | cofilin 1(CFL1)                                     | 18.502  |
| Q8TB22     | spermatogenesis associated 20(SPATA20)              | 87.899  |
| Q9UN36     | NDRG family member 2(NDRG2)                         | 40.798  |
| P08637     | Fc fragment of IgG receptor IIIa(FCGR3A)            | 29.089  |
| P09104     | enolase 2(ENO2)                                     | 47.269  |
| Q9UMF0     | intercellular adhesion molecule 5(ICAM5)            | 97.116  |
| Q96B86     | repulsive guidance molecule family member a(RGMA)   | 49.347  |
| P48745     | nephroblastoma overexpressed(NOV)                   | 39.162  |
| P06733     | enolase 1(ENO1)                                     | 47.169  |
| Q6NW4<br>0 | repulsive guidance molecule family member b(RGMB)   | 47.547  |
| Q96PX8     | SLIT and NTRK like family member 1(SLITRK1)         | 77.735  |
| P01717     | immunoglobulin lambda variable 3-25(IGLV3-25)       | 12.011  |
| Q13835     | plakophilin 1(PKP1)                                 | 82.861  |
| P32004     | L1 cell adhesion molecule(L1CAM)                    | 140.003 |
| Q99674     | cell growth regulator with EF-hand domain 1(CGREF1) | 31.905  |



|            |                                                                                                              |         |
|------------|--------------------------------------------------------------------------------------------------------------|---------|
| O00468     | agrin(AGRN)                                                                                                  | 217.32  |
| Q01469     | fatty acid binding protein 5(FABP5)                                                                          | 15.164  |
| Q08554     | desmocollin 1(DSC1)                                                                                          | 99.987  |
| P30530     | AXL receptor tyrosine kinase(AXL)                                                                            | 98.337  |
| P35326     | small proline rich protein 2A(SPRR2A)                                                                        | 7.965   |
| Q9BVG8     | kinesin family member C3(KIFC3)                                                                              | 92.775  |
| Q02413     | desmoglein 1(DSG1)                                                                                           | 113.748 |
| P14923     | junction plakoglobin(JUP)                                                                                    | 81.744  |
| Q6UX71     | plexin domain containing 2(PLXDC2)                                                                           | 59.583  |
| O15195     | villin like(VILL)                                                                                            | 95.907  |
| O00451     | GDNF family receptor alpha 2(GFRA2)                                                                          | 51.544  |
| Q5SRE5     | nucleoporin 188(NUP188)                                                                                      | 196.043 |
| P00915     | carbonic anhydrase 1(CA1)                                                                                    | 28.87   |
| P00748     | coagulation factor XII(F12)                                                                                  | 67.791  |
| P08185     | serpin family A member 6(SERPINA6)                                                                           | 45.14   |
| P11021     | heat shock protein family A (Hsp70) member 5(HSPA5)                                                          | 72.332  |
| P02144     | myoglobin(MB)                                                                                                | 17.184  |
| O15354     | G protein-coupled receptor 37(GPR37)                                                                         | 67.114  |
| P07451     | carbonic anhydrase 3(CA3)                                                                                    | 29.557  |
| P69905     | hemoglobin subunit alpha 1(HBA1)                                                                             | 15.257  |
| P68871     | hemoglobin subunit beta(HBB)                                                                                 | 15.998  |
| Q6UWP<br>8 | suprabasin(SBSN)                                                                                             | 60.541  |
| P49748     | acyl-CoA dehydrogenase, very long chain(ACADVL)                                                              | 70.39   |
| P25705     | ATP synthase, H <sup>+</sup> transporting, mitochondrial F1 complex, alpha subunit 1, cardiac muscle(ATP5A1) | 59.751  |
| Q06481     | amyloid beta precursor like protein 2(APLP2)                                                                 | 86.956  |
| Q9BQT9     | calsyntenin 3(CLSTN3)                                                                                        | 106.098 |

|            |                                                                                    |         |
|------------|------------------------------------------------------------------------------------|---------|
| P49908     | selenoprotein P(SELENOP)                                                           | 43.174  |
| P12235     | solute carrier family 25 member 4(SLC25A4)                                         | 33.064  |
| Q9UJJ9     | N-acetylglucosamine-1-phosphate transferase gamma subunit(GNPTG)                   | 33.974  |
| Q6UW0<br>1 | cerebellin 3 precursor(CBLN3)                                                      | 21.521  |
| Q53EL9     | seizure related 6 homolog(SEZ6)                                                    | 107.425 |
| O00391     | quiescin sulfhydryl oxidase 1(QSOX1)                                               | 82.578  |
| P43121     | melanoma cell adhesion molecule(MCAM)                                              | 71.607  |
| Q96JF0     | ST6 beta-galactoside alpha-2,6-sialyltransferase 2(ST6GAL2)                        | 60.158  |
| P09603     | colony stimulating factor 1(CSF1)                                                  | 60.179  |
| O00584     | ribonuclease T2(RNASET2)                                                           | 29.481  |
| P07333     | colony stimulating factor 1 receptor(CSF1R)                                        | 107.98  |
| P63104     | tyrosine 3-monooxygenase/tryptophan 5-monooxygenase activation protein zeta(YWHAZ) | 27.745  |
| P51884     | lumican(LUM)                                                                       | 38.429  |
| Q9UBX5     | fibulin 5(FBLN5)                                                                   | 50.18   |
| P62158     | calmodulin 1(CALM1)                                                                | 16.837  |
| P04075     | aldolase, fructose-bisphosphate A(ALDOA)                                           | 39.42   |
| Q92932     | protein tyrosine phosphatase, receptor type N2(PTPRN2)                             | 111.271 |
| P80723     | brain abundant membrane attached signal protein 1(BASP1)                           | 22.693  |
| P61916     | melanoma cell adhesion molecule(MCAM)                                              | 16.57   |
| Q9UM73     | anaplastic lymphoma receptor tyrosine kinase(ALK)                                  | 176.44  |
| P05156     | complement factor I(CFI)                                                           | 65.75   |
| P04196     | histidine rich glycoprotein(HRG)                                                   | 59.578  |

|        |                                                           |         |
|--------|-----------------------------------------------------------|---------|
| B9A064 | immunoglobulin lambda like polypeptide 5(IGLL5)           | 23.063  |
| Q9UI43 | mitochondrial rRNA methyltransferase 2(MRM2)              | 27.424  |
| P01781 | immunoglobulin heavy variable 3-7(IGHV3-7)                | 12.943  |
| O60241 | adhesion G protein-coupled receptor B2(ADGRB2)            | 172.656 |
| O75882 | attractin(ATRN)                                           | 158.537 |
| O60216 | RAD21 cohesin complex component(RAD21)                    | 71.69   |
| P23470 | protein tyrosine phosphatase, receptor type G(PTPRG)      | 162.003 |
| P06310 | immunoglobulin kappa variable 2-30(IGKV2-30)              | 13.185  |
| Q9BZR6 | reticulon 4 receptor(RTN4R)                               | 50.708  |
| P02656 | apolipoprotein C3(APOC3)                                  | 10.852  |
| P01625 | immunoglobulin kappa variable 4-1(IGKV4-1)                | 13.38   |
| Q7Z3B1 | neuronal growth regulator 1(NEGR1)                        | 38.719  |
| Q7Z7M0 | multiple EGF like domains 8(MEGF8)                        | 303.1   |
| P01610 | immunoglobulin kappa variable 1-17(IGKV1-17)              | 12.779  |
| O60888 | cutA divalent cation tolerance homolog(CUTA)              | 19.116  |
| Q13449 | limbic system-associated membrane protein(LSAMP)          | 37.393  |
| Q96FE7 | phosphoinositide-3-kinase interacting protein 1(PIK3IP1)  | 28.248  |
| P01861 | immunoglobulin heavy constant gamma 4 (G4m marker)(IGHG4) | 35.94   |
| P01593 | immunoglobulin kappa variable 1D-33(IGKV1D-33)            | 12.848  |
| Q8IWB9 | testis expressed 2(TEX2)                                  | 125.3   |
| P06703 | S100 calcium binding protein A6(S100A6)                   | 10.18   |
| P35580 | myosin heavy chain 10(MYH10)                              | 228.999 |
| Q9NYL9 | tropomodulin 3(TM0D3)                                     | 39.595  |
| P35749 | myosin heavy chain 11(MYH11)                              | 227.339 |
| Q99878 | histone cluster 1 H2A family member j(HIST1H2AJ)          | 13.936  |
| Q13813 | spectrin alpha, non-erythrocytic 1(SPTAN1)                | 284.593 |

|        |                                                                       |         |
|--------|-----------------------------------------------------------------------|---------|
| Q9Y2T3 | guanine deaminase(GDA)                                                | 51.003  |
| P17677 | growth associated protein 43(GAP43)                                   | 24.803  |
| Q9NZ53 | podocalyxin like 2(PODXL2)                                            | 65.076  |
| P06681 | complement C2(C2)                                                     | 83.267  |
| O00159 | myosin IC(MYO1C)                                                      | 121.682 |
| Q6UXB8 | peptidase inhibitor 16(PI16)                                          | 49.471  |
| Q13228 | selenium binding protein 1(SELENBP1)                                  | 52.391  |
| O75326 | semaphorin 7A (John Milton Hagen blood group)(SEMA7A)                 | 74.824  |
| O14773 | tripeptidyl peptidase 1(TPP1)                                         | 61.248  |
| P13611 | versican(VCAN)                                                        | 372.82  |
| Q9Y646 | carboxypeptidase Q(CPQ)                                               | 51.888  |
| Q13508 | ADP-ribosyltransferase 3(ART3)                                        | 43.923  |
| P14151 | selectin L(SELL)                                                      | 42.187  |
| P15924 | desmoplakin(DSP)                                                      | 331.77  |
| Q08629 | SPARC/osteonectin, cwcv and kazal like domains proteoglycan 1(SPOCK1) | 49.124  |
| Q24JP5 | transmembrane protein 132A(TMEM132A)                                  | 110.11  |
| P09972 | aldolase, fructose-bisphosphate C(ALDOC)                              | 39.455  |
| P01871 | immunoglobulin heavy constant mu(IGHM)                                | 49.44   |
| P00746 | complement factor D(CFD)                                              | 27.033  |
| O94769 | extracellular matrix protein 2(ECM2)                                  | 79.789  |
| Q8IWU5 | sulfatase 2(SULF2)                                                    | 100.455 |
| Q8TAG5 | V-set and transmembrane domain containing 2A(VSTM2A)                  | 25.833  |
| Q969P0 | immunoglobulin superfamily member 8(IGSF8)                            | 65.033  |
| Q96S96 | phosphatidylethanolamine binding protein 4(PEBP4)                     | 25.733  |
| P04180 | lecithin-cholesterol acyltransferase(LCAT)                            | 49.577  |

|        |                                                                          |         |
|--------|--------------------------------------------------------------------------|---------|
| P42785 | prolylcarboxypeptidase(PRCP)                                             | 55.8    |
| P78324 | signal regulatory protein alpha(SIRPA)                                   | 54.967  |
| Q92563 | SPARC/osteonectin, cwcv and kazal like domains<br>proteoglycan 2(SPOCK2) | 46.779  |
| Q12841 | follistatin like 1(FSTL1)                                                | 34.986  |
| Q86VB7 | CD163 molecule(CD163)                                                    | 125.451 |
| Q02818 | nucleobindin 1(NUCB1)                                                    | 53.879  |
| P04208 | immunoglobulin lambda variable 1-47(IGLV1-47)                            | 11.725  |
| P08123 | collagen type I alpha 2 chain(COL1A2)                                    | 129.314 |
| Q14982 | opioid binding protein/cell adhesion molecule<br>like(OPCML)             | 38.007  |
| O94919 | endonuclease domain containing 1(ENDOD1)                                 | 55.017  |
| P17936 | insulin like growth factor binding protein 3(IGFBP3)                     | 31.674  |
| Q9Y6R7 | Fc fragment of IgG binding protein(FCGBP)                                | 572.01  |
| P60174 | triosephosphate isomerase 1(TPI1)                                        | 30.791  |
| Q13740 | activated leukocyte cell adhesion molecule(ALCAM)                        | 65.102  |
| O15394 | neural cell adhesion molecule 2(NCAM2)                                   | 93.045  |
| P39060 | collagen type XVIII alpha 1 chain(COL18A1)                               | 178.19  |
| Q8TCZ2 | CD99 molecule like 2(CD99L2)                                             | 27.986  |
| P23515 | oligodendrocyte myelin glycoprotein(OMG)                                 | 49.608  |
| P18135 | immunoglobulin kappa variable 3-20(IGKV3-20)                             | 14.073  |
| O94910 | adhesion G protein-coupled receptor L1(ADGRL1)                           | 162.717 |
| Q9Y4C0 | neurexin 3(NRXN3)                                                        | 180.599 |
| Q9P2S2 | neurexin 2(NRXN2)                                                        | 184.98  |
| Q8NFZ8 | cell adhesion molecule 4(CADM4)                                          | 42.785  |
| P04406 | glyceraldehyde-3-phosphate dehydrogenase(GAPDH)                          | 36.053  |
| P43652 | afamin(AFM)                                                              | 69.068  |
| O94856 | neurofascin(NFASC)                                                       | 150.02  |

|        |                                                                  |         |
|--------|------------------------------------------------------------------|---------|
| Q13332 | protein tyrosine phosphatase, receptor type S(PTPRS)             | 217.04  |
| P35579 | myosin heavy chain 9(MYH9)                                       | 226.532 |
| Q9UPU3 | sortilin related VPS10 domain containing receptor 3(SORCS3)      | 135.755 |
| P01344 | insulin like growth factor 2(IGF2)                               | 20.14   |
| P02675 | fibrinogen beta chain(FGB)                                       | 55.928  |
| Q8NBJ4 | golgi membrane protein 1(GOLM1)                                  | 45.333  |
| Q16610 | extracellular matrix protein 1(ECM1)                             | 60.673  |
| Q5T749 | keratinocyte proline rich protein(KPRP)                          | 64.135  |
| Q92859 | neogenin 1(NEO1)                                                 | 160.017 |
| P02679 | fibrinogen gamma chain(FGG)                                      | 51.511  |
| P55058 | phospholipid transfer protein(PLTP)                              | 54.739  |
| Q5BLP8 | chromosome 4 open reading frame 48(C4orf48)                      | 10.17   |
| Q14624 | inter-alpha-trypsin inhibitor heavy chain family member 4(ITIH4) | 103.36  |
| P08253 | matrix metalloproteinase 2(MMP2)                                 | 73.882  |
| P0C0L5 | complement C4B (Chido blood group)(C4B)                          | 192.75  |
| P19021 | peptidylglycine alpha-amidating monooxygenase(PAM)               | 108.33  |
| P36222 | chitinase 3 like 1(CHI3L1)                                       | 42.625  |
| P16035 | TIMP metalloproteinase inhibitor 2(TIMP2)                        | 24.399  |
| Q8N126 | cell adhesion molecule 3(CADM3)                                  | 43.299  |
| P17174 | glutamic-oxaloacetic transaminase 1(GOT1)                        | 46.247  |
| P22692 | insulin like growth factor binding protein 4(IGFBP4)             | 27.934  |
| Q99574 | serpin family I member 1(SERPINI1)                               | 46.427  |
| Q9P121 | neurotrimin(NTM)                                                 | 37.971  |
| P23471 | protein tyrosine phosphatase, receptor type Z1(PTPRZ1)           | 254.58  |
| P01033 | TIMP metalloproteinase inhibitor 1(TIMP1)                        | 23.171  |

|            |                                                                                           |         |
|------------|-------------------------------------------------------------------------------------------|---------|
| P12109     | collagen type VI alpha 1 chain(COL6A1)                                                    | 108.53  |
| Q02246     | contactin 2(CNTN2)                                                                        | 113.39  |
| P12259     | coagulation factor V(F5)                                                                  | 251.703 |
| P07195     | lactate dehydrogenase B(LDHB)                                                             | 36.638  |
| Q15904     | ATPase H+ transporting accessory protein<br>1(ATP6AP1)                                    | 52.026  |
| Q96GW<br>7 | brevican(BCAN)                                                                            | 99.117  |
| P54764     | EPH receptor A4(EPHA4)                                                                    | 109.86  |
| Q15113     | procollagen C-endopeptidase enhancer(PCOLCE)                                              | 47.972  |
| P78509     | reelin(RELN)                                                                              | 388.38  |
| P22352     | glutathione peroxidase 3(GPX3)                                                            | 25.552  |
| P14618     | pyruvate kinase, muscle(PKM)                                                              | 57.936  |
| P02760     | alpha-1-microglobulin/bikunin precursor(AMBP)                                             | 38.999  |
| P63261     | actin gamma 1(ACTG1)                                                                      | 41.792  |
| P0DJ18     | serum amyloid A1(SAA1)                                                                    | 13.532  |
| P02753     | retinol binding protein 4(RBP4)                                                           | 23.01   |
| P54289     | calcium voltage-gated channel auxiliary subunit<br>alpha2delta 1(CACNA2D1)                | 124.568 |
| P01766     | immunoglobulin heavy variable 3-13(IGHV3-13)                                              | 13.227  |
| Q8TEU8     | WAP, follistatin/kazal, immunoglobulin, kunitz and<br>netrin domain containing 2(WFIKKN2) | 63.941  |
| P08697     | serpin family F member 2(SERPINF2)                                                        | 54.566  |
| P02452     | collagen type I alpha 1 chain(COL1A1)                                                     | 138.941 |
| P05408     | secretogranin V(SCG5)                                                                     | 23.729  |
| P10643     | complement C7(C7)                                                                         | 93.517  |
| Q15818     | neuronal pentraxin 1(NPTX1)                                                               | 47.122  |
| P07858     | cathepsin B(CTSB)                                                                         | 37.822  |

|        |                                                      |        |
|--------|------------------------------------------------------|--------|
| P05546 | serpin family D member 1(SERPIND1)                   | 57.07  |
| P02765 | alpha 2-HS glycoprotein(AHSG)                        | 39.324 |
| P16870 | carboxypeptidase E(CPE)                              | 53.15  |
| P02748 | complement C9(C9)                                    | 63.173 |
| P02746 | complement C1q B chain(C1QB)                         | 26.722 |
| P24592 | insulin like growth factor binding protein 6(IGFBP6) | 25.322 |
| Q96KN2 | carnosine dipeptidase 1(CNDP1)                       | 56.705 |
| P19022 | cadherin 2(CDH2)                                     | 99.808 |
| O43505 | beta-1,4-glucuronyltransferase 1(B4GAT1)             | 47.119 |
| P02747 | complement C1q C chain(C1QC)                         | 25.773 |
| Q14118 | dystroglycan 1(DAG1)                                 | 97.44  |
| P01617 | immunoglobulin kappa variable 2D-28(IGKV2D-28)       | 12.957 |
| P17900 | GM2 ganglioside activator(GM2A)                      | 20.838 |
| O14594 | neurocan(NCAN)                                       | 143.09 |
| Q9ULB1 | neurexin 1(NRXN1)                                    | 161.88 |
| P00736 | complement C1r(C1R)                                  | 80.118 |
| P04433 | immunoglobulin kappa variable 3D-11(IGKV3D-11)       | 12.575 |
| P00441 | superoxide dismutase 1, soluble(SOD1)                | 15.936 |
| P07998 | ribonuclease A family member 1, pancreatic(RNASE1)   | 17.644 |
| P07339 | cathepsin D(CTSD)                                    | 44.552 |
| P04004 | vitronectin(VTN)                                     | 54.305 |
| P18065 | insulin like growth factor binding protein 2(IGFBP2) | 34.814 |
| P55290 | cadherin 13(CDH13)                                   | 78.286 |
| P09871 | complement C1s(C1S)                                  | 76.684 |
| P08571 | CD14 molecule(CD14)                                  | 40.076 |
| P30086 | phosphatidylethanolamine binding protein 1(PEBP1)    | 21.057 |
| P02652 | apolipoprotein A2(APOA2)                             | 11.175 |
| P02750 | leucine rich alpha-2-glycoprotein 1(LRG1)            | 38.178 |



|        |                                                                  |        |
|--------|------------------------------------------------------------------|--------|
| P01860 | immunoglobulin heavy constant gamma 3 (G3m marker)(IGHG3)        | 41.287 |
| P00734 | coagulation factor II, thrombin(F2)                              | 70.036 |
| P07225 | protein S (alpha)(PROS1)                                         | 75.122 |
| P20774 | osteoglycin(OGN)                                                 | 33.922 |
| P04216 | Thy-1 cell surface antigen(THY1)                                 | 17.935 |
| P62987 | ubiquitin A-52 residue ribosomal protein fusion product 1(UBA52) | 14.728 |
| O95502 | neuronal pentraxin receptor(NPTXR)                               | 52.846 |
| P01042 | kininogen 1(KNG1)                                                | 71.957 |
| P13591 | neural cell adhesion molecule 1(NCAM1)                           | 94.573 |
| Q66K66 | transmembrane protein 198(TMEM198)                               | 39.474 |
| Q12860 | contactin 1(CNTN1)                                               | 113.32 |
| P61769 | beta-2-microglobulin(B2M)                                        | 13.714 |
| P13521 | secretogranin II(SCG2)                                           | 70.94  |
| P01008 | serpin family C member 1(SERPINC1)                               | 52.602 |
| P25311 | alpha-2-glycoprotein 1, zinc-binding(AZGP1)                      | 34.258 |
| P00747 | plasminogen(PLG)                                                 | 90.568 |
| P08294 | superoxide dismutase 3, extracellular(SOD3)                      | 25.851 |
| P09486 | secreted protein acidic and cysteine rich(SPARC)                 | 34.632 |
| P01210 | proenkephalin(PENK)                                              | 30.787 |
| P01859 | immunoglobulin heavy constant gamma 2 (G2m marker)(IGHG2)        | 35.9   |
| P04217 | alpha-1-B glycoprotein(A1BG)                                     | 54.253 |
| P13987 | CD59 molecule(CD59)                                              | 14.177 |
| P01623 | immunoglobulin kappa variable 3-20(IGKV3-20)                     | 11.746 |
| P01876 | immunoglobulin heavy constant alpha 1(IGHA1)                     | 37.654 |
| Q9NQ79 | cartilage acidic protein 1(CRTAC1)                               | 71.42  |

|            |                                                                    |        |
|------------|--------------------------------------------------------------------|--------|
| Q99435     | neural EGFL like 2(NELL2)                                          | 91.346 |
| Q92876     | kallikrein related peptidase 6(KLK6)                               | 26.855 |
| P05067     | amyloid beta precursor protein(APP)                                | 86.942 |
| P0CG05     | immunoglobulin lambda constant 2(IGLC2)                            | 11.293 |
| P05452     | C-type lectin domain family 3 member B(CLEC3B)                     | 22.537 |
| Q12805     | EGF containing fibulin like extracellular matrix protein 1(EFEMP1) | 54.64  |
| P02749     | apolipoprotein H(APOH)                                             | 38.298 |
| Q08380     | galectin 3 binding protein(LGALS3BP)                               | 65.33  |
| O15240     | VGF nerve growth factor inducible(VGF)                             | 67.257 |
| O00533     | cell adhesion molecule L1 like(CHL1)                               | 135.07 |
| P01834     | immunoglobulin kappa constant(IGKC)                                | 11.609 |
| Q9UHG<br>2 | proprotein convertase subtilisin/kexin type 1 inhibitor(PCSK1N)    | 27.372 |
| P07602     | prosaposin(PSAP)                                                   | 58.112 |
| P05155     | serpin family G member 1(SERPING1)                                 | 55.154 |
| P06727     | apolipoprotein A4(APOA4)                                           | 45.398 |
| P08603     | complement factor H(CFH)                                           | 139.09 |
| P00751     | complement factor B(CFB)                                           | 85.532 |
| P51693     | amyloid beta precursor like protein 1(APLP1)                       | 72.176 |
| O94985     | calsyntenin 1(CLSTN1)                                              | 109.79 |
| Q14515     | SPARC like 1(SPARCL1)                                              | 75.207 |
| Q16270     | insulin like growth factor binding protein 7(IGFBP7)               | 29.13  |
| Q8WXD<br>2 | secretogranin III(SCG3)                                            | 53.005 |
| P10645     | chromogranin A(CHGA)                                               | 50.688 |
| Q92823     | neuronal cell adhesion molecule(NRCAM)                             | 143.89 |
| P01011     | serpin family A member 3(SERPINA3)                                 | 47.65  |

|        |                                                           |        |
|--------|-----------------------------------------------------------|--------|
| P23142 | fibulin 1(FBLN1)                                          | 77.213 |
| P02751 | fibronectin 1(FN1)                                        | 262.62 |
| P19652 | orosomuroid 2(ORM2)                                       | 23.602 |
| P02774 | GC, vitamin D binding protein(GC)                         | 52.963 |
| P10451 | secreted phosphoprotein 1(SPP1)                           | 35.422 |
| P00450 | ceruloplasmin(CP)                                         | 122.2  |
| P01023 | alpha-2-macroglobulin(A2M)                                | 163.29 |
| Q9UBP4 | dickkopf WNT signaling pathway inhibitor 3(DKK3)          | 38.39  |
| P01019 | angiotensinogen(AGT)                                      | 53.154 |
| P02647 | apolipoprotein A1(APOA1)                                  | 30.777 |
| P01009 | serpin family A member 1(SERPINA1)                        | 46.736 |
| Q13822 | ectonucleotide pyrophosphatase/phosphodiesterase 2(ENPP2) | 98.993 |
| P05060 | chromogranin B(CHGB)                                      | 78.275 |
| P05090 | apolipoprotein D(APOD)                                    | 21.275 |
| P0C0L4 | complement C4A (Rodgers blood group)(C4A)                 | 192.78 |
| P01034 | cystatin C(CST3)                                          | 15.799 |
| P00738 | haptoglobin(HP)                                           | 45.205 |
| P01024 | complement C3(C3)                                         | 187.15 |
| P02763 | orosomuroid 1(ORM1)                                       | 23.511 |
| P36955 | serpin family F member 1(SERPINF1)                        | 46.312 |
| P10909 | clusterin(CLU)                                            | 52.494 |
| P41222 | prostaglandin D2 synthase(PTGDS)                          | 21.029 |
| P01857 | immunoglobulin heavy constant gamma 1 (G1m marker)(IGHG1) | 36.105 |
| P02790 | hemopexin(HPX)                                            | 51.676 |
| P02649 | apolipoprotein E(APOE)                                    | 36.154 |
| P02787 | transferrin(TF)                                           | 77.063 |

|        |                    |        |
|--------|--------------------|--------|
| P02766 | transthyretin(TTR) | 15.887 |
|--------|--------------------|--------|
